# Supplementary material for: Genetic structure and demographic history of the endangered tree species Dysoxylum malabaricum (Meliaceae) in Western Ghats, India: implications for conservation in a biodiversity hotspot
Source: PubMed Central journal article supplement (PMC3797473; doi:10.1002/ece3.669), 2013-08-06

Fig.S4

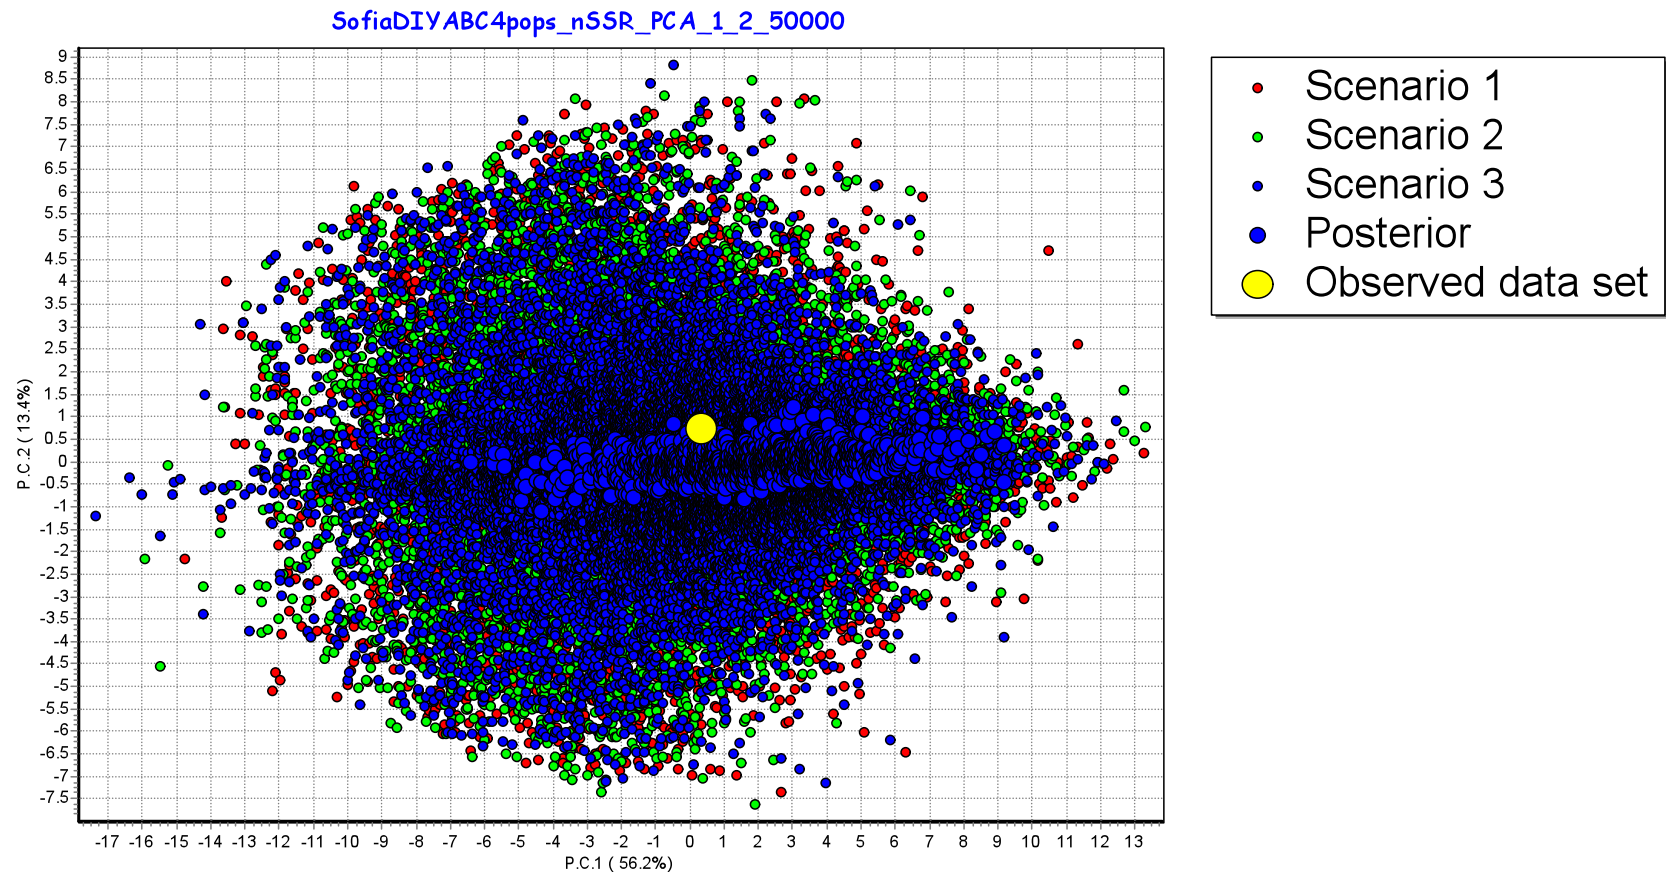

Supplement: ece30003-3233-SD4.pdf [file ece30003-3233-SD4.pdf]
